# Supplementary material for: Application of Electronic Nose to Predict the Optimum Fermentation Time for Low-Country Sri Lankan Tea
Source: Hindawi journal article supplement (doi:10.1155/2022/7703352), 2022-02-23

## Supporting Information

### Application of e-nose to predict the optimum fermentation time for low country Sri Lankan tea.

Tharaga Sharmilan,<sup>1</sup> Iresha Premarathne,<sup>1</sup> Indika Wanniarachchi<sup>2</sup>, Sandya Kumai<sup>3</sup> and Dakshika Wanniarachchi<sup>1\*</sup>

**Table S1:** Smell peaks recorded on each sensor

|    | Date           | SVD processed peaks |               |               |          |               |               |               |               |               |               |               |               |
|----|----------------|---------------------|---------------|---------------|----------|---------------|---------------|---------------|---------------|---------------|---------------|---------------|---------------|
|    |                | MQ2 (S1)            |               |               | MQ3 (S2) |               |               | MQ4 (S3)      |               |               | MQ5 (S4)      |               |               |
|    |                | Peak 1 (min.)       | Peak 2 (min.) | Peak 3 (min.) | Peak 1   | Peak 2 (min.) | Peak 3 (min.) | Peak 1 (min.) | Peak 2 (min.) | Peak 3 (min.) | Peak 1 (min.) | Peak 2 (min.) | Peak 3 (min.) |
| 1  | 2019_10_02_B4  | 16.5                | 25.5          | 37.5          | 10.5     | 40.5          |               | 10.5          | 40.5          |               | 10.5          | 40.5          |               |
| 2  | 2019_10_02_B6  | 16.5                | 25.5          | 46.5          | 10.5     |               |               | 10.5          |               |               | 10.5          |               |               |
| 3  | 2019_10_02_B7  | 19.5                | 40.5          | 73.5          | 19.5     | 37.5          | 73.5          | 19.5          | 37.5          | 73.5          | 19.5          | 37.5          | 73.5          |
| 4  | 2019_10_02_B9  | 22.5                | 31.5          | 52.5          | 43.5     | 67.5          | 88.5          | 43.5          | 67.5          | 88.5          | 43.5          | 67.5          | 88.5          |
| 5  | 2019_10_03_B7  | 22.5                | 37.5          | 46.5          | 22.5     | 40.5          | 52.5          | 22.5          | 40.5          | 52.5          | 22.5          | 40.5          | 52.5          |
| 6  | 2019_10_03_B8  | 34.5                | 52.5          | 76.5          | 16.5     | 46.5          | 73.5          | 16.5          | 46.5          | 73.5          | 16.5          | 46.5          | 73.5          |
| 7  | 2019_10_09_B3  | 25.5                | 37.5          | 46.5          | 25.5     | 43.5          | 52.5          | 25.5          | 43.5          | 52.5          | 25.5          | 43.5          | 52.5          |
| 8  | 2019_10_09_B5  | 28.5                | 49.5          |               | 16.5     | 43.5          | 88.5          | 16.5          | 43.5          | 88.5          | 16.5          | 43.5          | 88.5          |
| 9  | 2019_10_09_B7  | 22.5                | 64.5          | 79.5          | 16.5     | 28.5          | 43.5          | 16.5          | 28.5          | 43.5          | 16.5          | 28.5          | 43.5          |
| 10 | 2019_10_10_B4  | 22.5                | 46.5          | 61.5          | 43.5     | 61.5          | 88.5          | 43.5          | 61.5          | 88.5          | 43.5          | 61.5          | 88.5          |
| 11 | 2019_10_10_B6  | 25.5                |               |               | 28.5     | 40.5          |               | 28.5          | 40.5          |               | 28.5          | 40.5          |               |
| 12 | 2019_10_10_B11 | 25.5                | 37.5          | 49.5          | 25.5     | 49.5          |               | 25.5          | 49.5          |               | 25.5          | 49.5          |               |
| 13 | 2019-11-05-B8  | 16.5                | 37.5          | 49.5          | 19.5     | 40.5          | 58.5          | 10.5          | 37.5          | 49.5          | 10.5          | 49.5          | 67.5          |
| 14 | 2019-11-06-B8  | 49.5                | 70.5          |               | 19.5     | 55.5          | 88.5          | 19.5          | 49.5          | 64.5          | 25.5          | 43.5          | 76.5          |
| 15 | 2019_11_07_B3  | 31.5                | 58.5          | 85.5          | 25.5     | 40.5          | 64.5          | 25.5          | 40.5          | 64.5          | 25.5          | 40.5          | 64.5          |
| 16 | 2019-11-07-B7  |                     | 49.5          | 70.5          | 19.5     | 55.5          | 88.5          | 19.5          | 49.5          | 64.5          | 25.5          | 43.5          | 76.5          |
| 17 | 2019-11-13-B4  | 28.5                | 43.5          | 91.5          |          | 64.5          |               |               |               | 91.5          | 25.5          | 46.5          | 73.5          |
| 18 | 2019-12-09-B3  |                     |               |               | 13.5     | 31.5          |               | 13.5          | 31.5          |               | 13.5          | 31.5          |               |
| 19 | 2019-12-09-B5  | 10.5                | 43.5          |               | 16.5     | 31.5          | 52.5          | 16.5          | 31.5          | 52.5          | 16.5          | 31.5          | 52.5          |
| 20 | 2019-12-09-B7  |                     | 46.5          |               | 10.5     | 31.5          | 43.5          | 19.5          |               |               | 19.5          | 31.5          |               |
| 21 | 2019-12-09-B8  | 10.5                | 31.5          | 85.5          | 31.5     | 46.5          |               | 13.5          | 49.5          | 73.5          | 25.5          | 40.5          | 61.5          |
| 22 | 2019-12-10-B5  | 28.5                | 52.5          |               |          | 46.5          |               | 22.5          | 49.5          |               | 13.5          | 37.5          | 52.5          |

|    |                |      |      |      |      |      |      |      |      |      |      |      |       |
|----|----------------|------|------|------|------|------|------|------|------|------|------|------|-------|
| 23 | 2019-12-10-B7  | 19.5 | 46.5 | 61.5 | 10.5 | 40.5 | 49.5 | 10.5 | 40.5 | 49.5 | 10.5 | 40.5 | 49.5  |
| 24 | 2019-12-10-B9  | 31.5 | 58.5 |      | 25.5 | 40.5 | 61.5 | 10.5 | 40.5 | 52.5 | 10.5 | 31.5 | 46.5  |
| 25 | 2019-12-12-B4  | 28.5 | 43.5 | 91.5 |      |      | 64.5 |      |      | 91.5 | 25.5 | 46.5 | 73.5  |
| 26 | 2019-12-12-B6  | 25.5 | 37.5 | 55.5 | 16.5 | 37.5 | 70.5 | 28.5 | 43.5 | 73.5 | 13.5 | 28.5 | 49.5  |
| 27 | 2019-12-12-B9  | 25.5 | 40.5 |      | 22.5 | 40.5 | 79.5 | 28.5 | 55.5 |      | 25.5 | 49.5 | 67.5  |
| 28 | 2019-12-12-B11 | 28.5 | 40.5 | 70.5 | 37.5 | 58.5 |      | 25.5 | 40.5 |      | 28.5 | 49.5 |       |
| 29 | 2019-12-16-B5  | 34.5 | 49.5 | 73.5 | 19.5 |      | 73.5 | 10.5 | 34.5 | 73.5 |      | 43.5 | 79.5  |
| 30 | 2019-12-16-B7  |      | 40.5 | 55.5 | 10.5 | 28.5 | 52.5 | 16.5 | 43.5 | 55.5 | 13.5 | 37.5 | 55.5  |
| 31 | 2019-12-16-B8  | 37.5 | 67.5 |      | 16.5 | 28.5 | 46.5 | 28.5 | 43.5 | 70.5 | 28.5 | 43.5 | 67.5  |
| 32 | 2019-12-17-B3  | 13.5 | 31.5 | 58.5 | 19.5 | 34.5 | 61.5 | 19.5 | 34.5 | 61.5 | 19.5 | 34.5 | 61.5  |
| 33 | 2019-12-17-B4  | 22.5 | 52.5 | 64.5 | 28.5 |      | 67.5 |      | 34.5 |      | 10.5 | 43.5 | 70.5  |
| 34 | 2019-12-17-B6  |      | 43.5 |      | 10.5 | 46.5 |      | 10.5 | 28.5 | 46.5 | 10.5 | 43.5 |       |
| 35 | 2019-12-17-B9  | 22.5 | 31.5 | 55.5 | 13.5 | 43.5 |      | 13.5 | 43.5 |      | 13.5 | 43.5 |       |
| 36 | 2020-07-02-B2  | 37.5 |      |      | 13.5 | 37.5 |      | 13.5 | 37.5 |      | 13.5 | 37.5 |       |
| 37 | 2020-07-02-B4  | 13.5 | 43.5 | 52.5 | 16.5 | 52.5 | 70.5 | 16.5 | 52.5 | 70.5 | 16.5 | 52.5 | 70.5  |
| 38 | 2020-07-02-B8  | 49.5 | 73.5 | 82.5 | 19.5 | 52.5 | 64.5 | 19.5 | 52.5 | 64.5 | 19.5 | 52.5 | 64.5  |
| 39 | 2020-07-03-B1  | 49.5 | 73.5 | 82.5 | 19.5 | 52.5 | 64.5 | 19.5 | 52.5 | 64.5 | 19.5 | 52.5 | 64.5  |
| 40 | 2020-07-03-B3  | 25.5 | 37.5 | 61.5 | 25.5 | 37.5 | 61.5 | 19.5 | 34.5 | 64.5 | 28.5 | 43.5 | 61.5  |
| 41 | 2020-07-03-B5  | 13.5 | 46.5 | 67.5 | 22.5 | 34.5 | 55.5 | 10.5 | 37.5 | 67.5 | 19.5 | 64.5 | 100.5 |
| 42 | 2020-07-06-B1  | 10.5 | 28.5 |      | 13.5 | 22.5 | 34.5 | 13.5 | 22.5 | 34.5 | 13.5 | 22.5 | 34.5  |
| 43 | 2020-07-06-B3  | 19.5 | 46.5 | 67.5 | 19.5 | 31.5 | 40.5 | 19.5 | 31.5 | 40.5 | 19.5 | 31.5 | 40.5  |
| 44 | 2020-07-06-B6  | 13.5 | 31.5 | 49.5 | 13.5 | 31.5 | 49.5 | 16.5 | 34.5 | 52.5 | 19.5 | 31.5 | 58.5  |
| 45 | 2020-07-06-B9  | 37.5 | 52.5 | 52.5 | 28.5 | 49.5 | 73.5 | 31.5 |      | 91.5 | 10.5 | 46.5 | 61.5  |
| 46 | 2020-07-07-B2  | 25.5 |      | 61.5 | 10.5 | 25.5 | 43.5 | 13.5 | 34.5 | 49.5 | 25.5 | 43.5 | 58.5  |
| 47 | 2020-07-07-B7  | 34.5 | 46.5 | 64.5 | 10.5 | 34.5 | 61.5 |      | 43.5 | 70.5 | 16.5 | 52.5 | 76.5  |
| 48 | 2020-07-07-B11 | 28.5 | 73.5 | 91.5 | 10.5 | 49.5 | 70.5 | 10.5 | 37.5 | 49.5 | 25.5 | 43.5 | 70.5  |

Figure S1. Average variation of Theaflavin with time

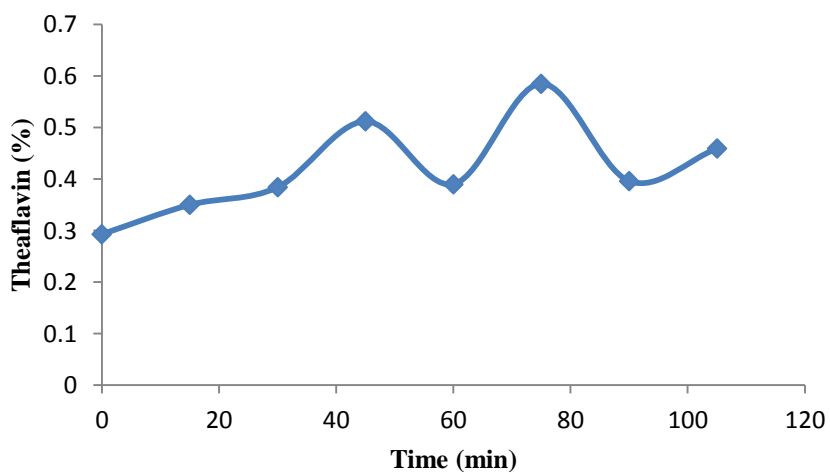

Supplement: f1 [file 7703352.f1.pdf]
